# Supplementary material
Source: PubMed Central journal article supplement (PMC1995143)
Supplement: cmaj_177_8_867_v2_1.pdf [file cmaj_177_8_867_v2_1.pdf]

**Appendix 1: Adverse events among participants in the randomized controlled trial of effect of perindopril on physical function in elderly people**

| Adverse event                    | Group; no. of participants*  |                          |
|----------------------------------|------------------------------|--------------------------|
|                                  | Perindopril<br><i>n</i> = 65 | Placebo<br><i>n</i> = 65 |
| Admission to hospital            | 5 (2)†                       | 4 (2)‡                   |
| Symptomatic postural hypotension | 0                            | 5 (5)                    |
| Stroke                           | 0                            | 1 (1)                    |
| Fall                             | 8 (2)                        | 10 (2)                   |
| Collapse                         | 2                            | 1 (1)                    |
| Fracture                         | 3 (2)                        | 2 (2)                    |
| Cough                            | 9 (5)                        | 0                        |
| Rash                             | 1                            | 1 (1)                    |
| Dizziness                        | 1 (1)                        | 0                        |
| Headache and myalgia             | 1 (1)                        | 0                        |
| Gastrointestinal disturbance     | 7 (4)                        | 3 (1)                    |
| Edema                            | 0                            | 1 (1)                    |
| Impotence                        | 1 (1)                        | 0                        |

\*Numbers in parentheses indicate number of participants whose adverse event led to withdrawal from the trial. Some participants experienced more than 1 adverse event.  
 †Reasons for admission: elective cataract surgery (1); syncopal attack (1); fractured humerus from fall (1); repair of rectal prolapse (1); pancreatitis and, later, subacute intestinal obstruction (1).

‡Reasons for admission: hip fracture from fall (1); collapse and stroke (1); elective trigeminal nerve release (1); chest infection and, later, cellulitis (1).
